# Supplementary material for: Design and preparation of Fe3O4@PVA polymeric magnetic nanocomposite film and surface coating by sulfonic acid via in situ methods and evaluation of its catalytic performance in the synthesis of dihydropyrimidines
Source: BMC Chem. 2019 Feb 4;13(1):19. doi: 10.1186/s13065-019-0538-2 (PMC6661808; doi:10.1186/s13065-019-0538-2)
Supplement: Supplementary file 1 — Additional file 1. Supporting information. [file 13065_2019_538_MOESM1_ESM.pdf]

## Supplementary Information

### Design and preparation of Fe<sub>3</sub>O<sub>4</sub>@PVA polymeric magnetic nanocomposite film and surface coating by sulfonic acid via in-situ methods and evaluation of its catalytic performance in the synthesis of dihydropyrimidines

Ali Maleki\*, Maryam Niksefat, Jamal Rahimi, Zoleikha Hajizadeh

*Catalysts and Organic Synthesis Research Laboratory, Department of Chemistry, Iran  
University of Science and Technology, Tehran 16846-13114, Iran*

*\*Corresponding author. E-mail: [maleki@iust.ac.ir](mailto:maleki@iust.ac.ir); Fax: +98-21-73021584; Tel: +98-21-77240540-50*

#### Table of contents

| <i>Subject</i>                                                          | <i>Page</i> |
|-------------------------------------------------------------------------|-------------|
| Figure S1. <sup>1</sup> H NMR spectrum of the product <b>4c</b> .....   | S2          |
| Figure S2. <sup>13</sup> C NMR spectrum of the product <b>4c</b> .....  | S3          |
| Figure S3. <sup>1</sup> H NMR spectrum of the product <b>4f</b> .....   | S4          |
| Figure S4. <sup>13</sup> C NMR spectrum of the product <b>4f</b> .....  | S5          |
| Figure S5. <sup>1</sup> H NMR spectrum of the product <b>4j</b> .....   | S6          |
| Figure S6. <sup>13</sup> C NMR spectrum of the product <b>4j</b> .....  | S7          |
| Figure S7. <sup>1</sup> H NMR spectrum of the product <b>4r</b> .....   | S8          |
| Figure S8. <sup>1</sup> H NMR spectrum of the product <b>4s</b> .....   | S9          |
| Figure S9. <sup>13</sup> C NMR spectrum of the product <b>4s</b> .....  | S10         |
| Figure S10. <sup>1</sup> H NMR spectrum of the product <b>4t</b> .....  | S11         |
| Figure S11. <sup>13</sup> C NMR spectrum of the product <b>4t</b> ..... | S12         |
| Figure S12. <sup>1</sup> H NMR spectrum of the product <b>4v</b> .....  | S13         |
| Figure S13. <sup>13</sup> C NMR spectrum of the product <b>4v</b> ..... | S14         |

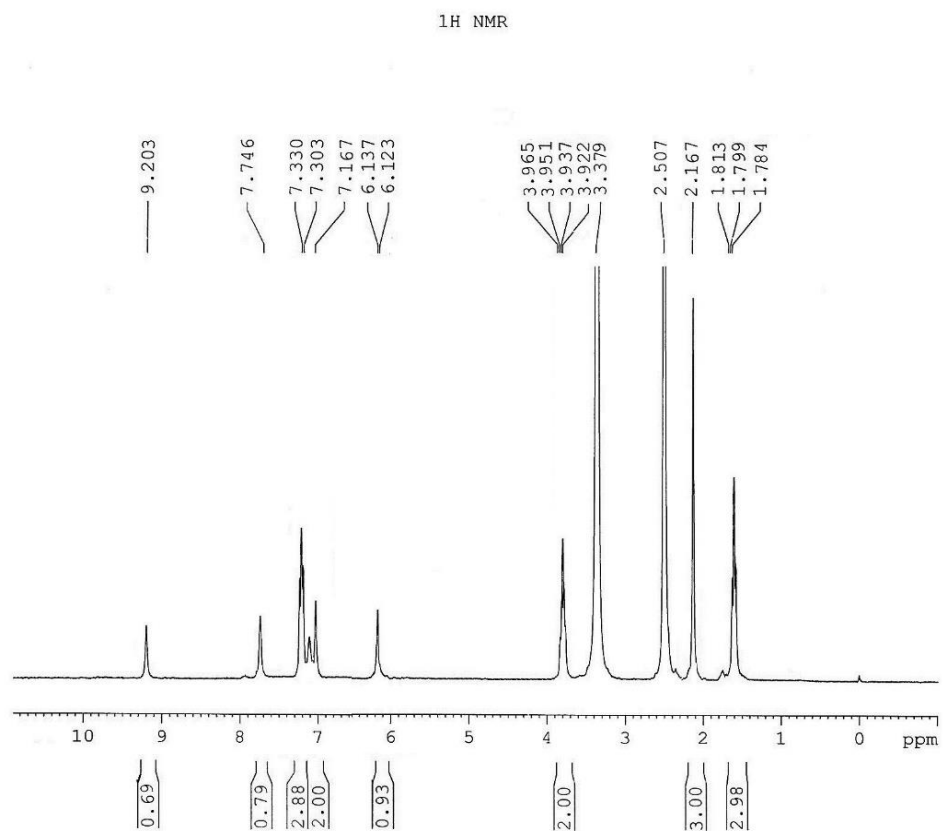

**Figure S1.**  $^1\text{H}$  NMR spectrum of the product **4c**.

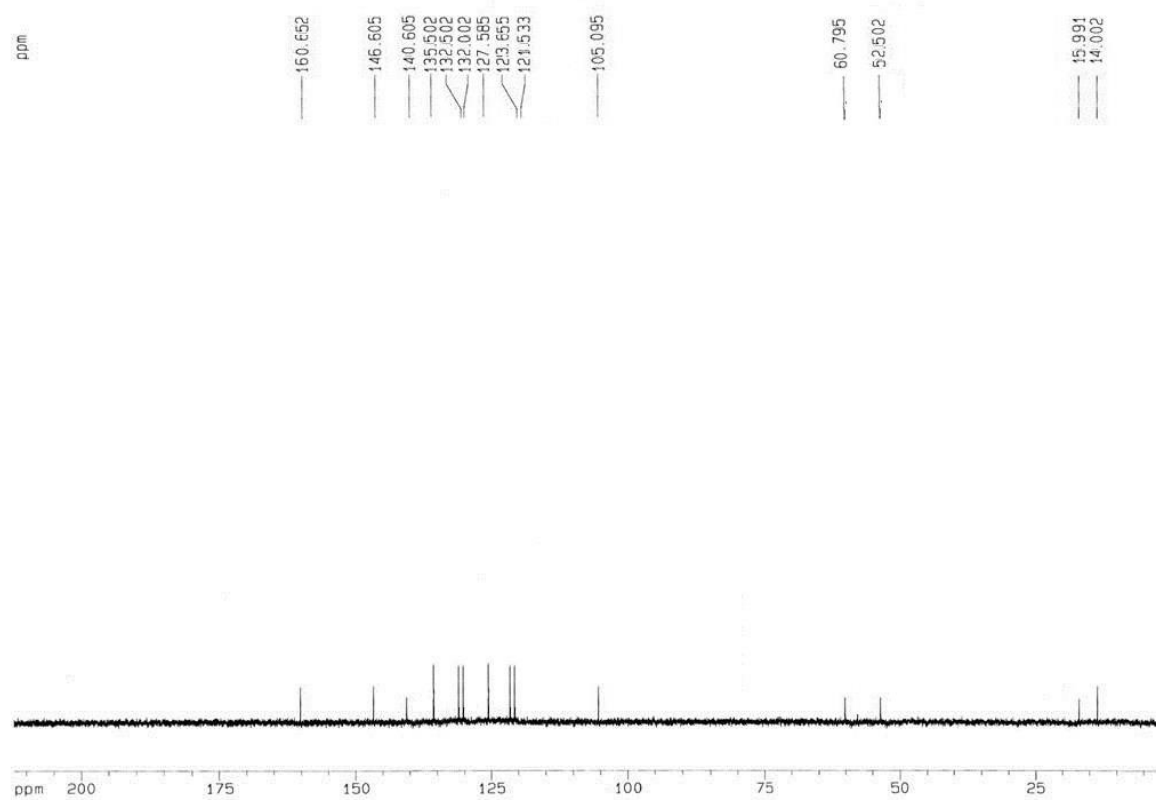

**Figure S2.**  $^{13}\text{C}$  NMR spectrum of the product **4c**.

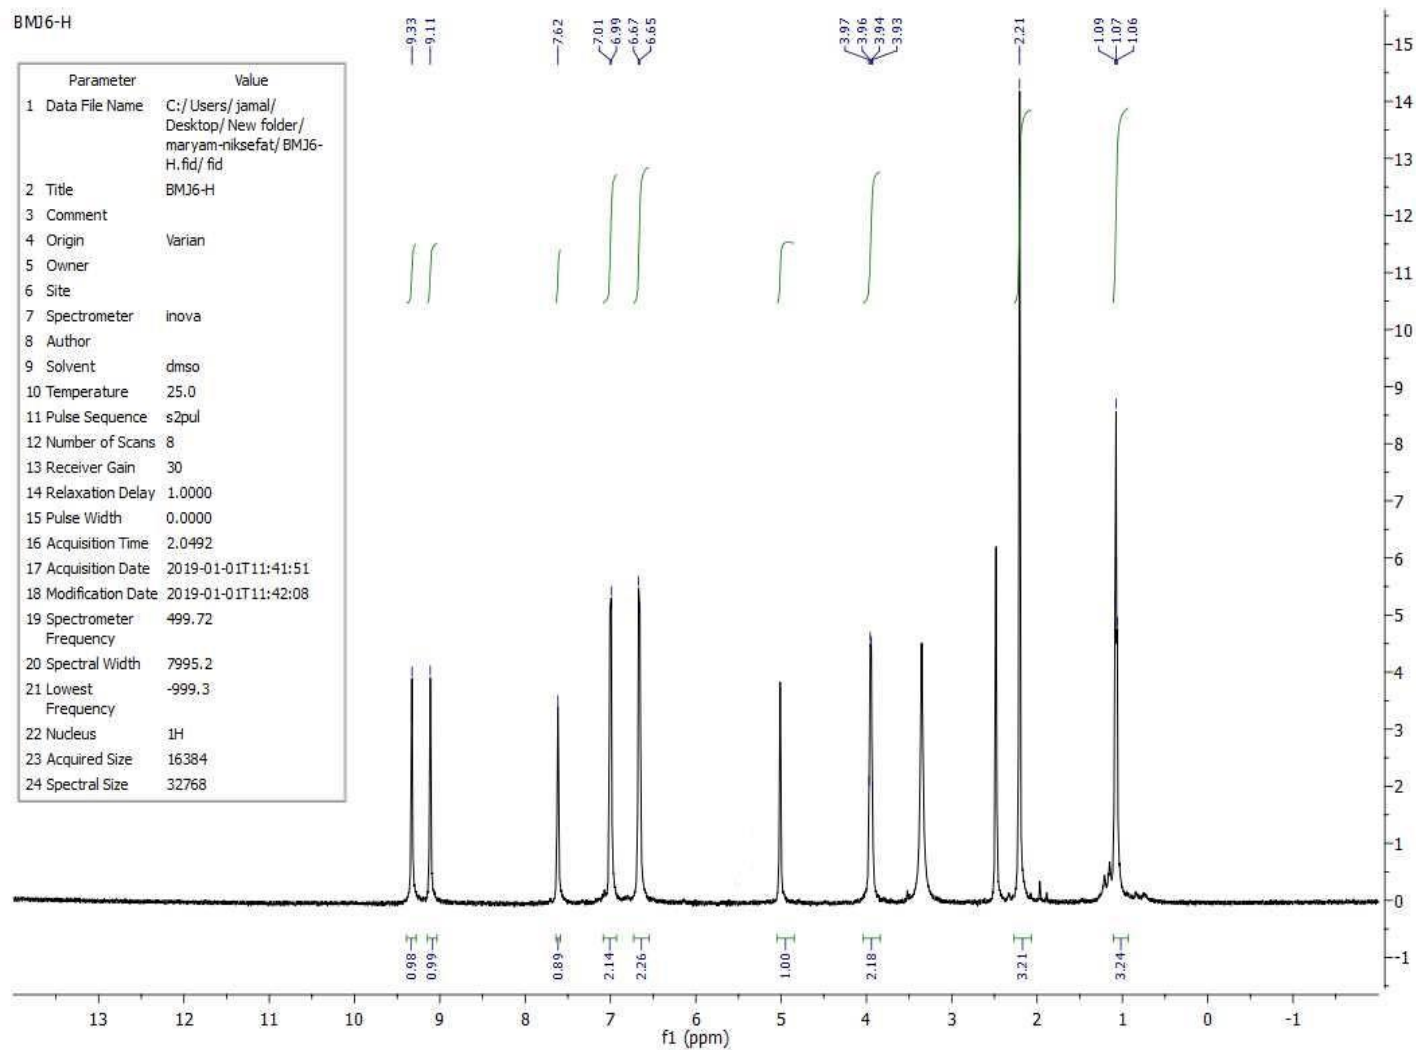

**Figure S3.** <sup>1</sup>H NMR spectrum of the product **4f**.

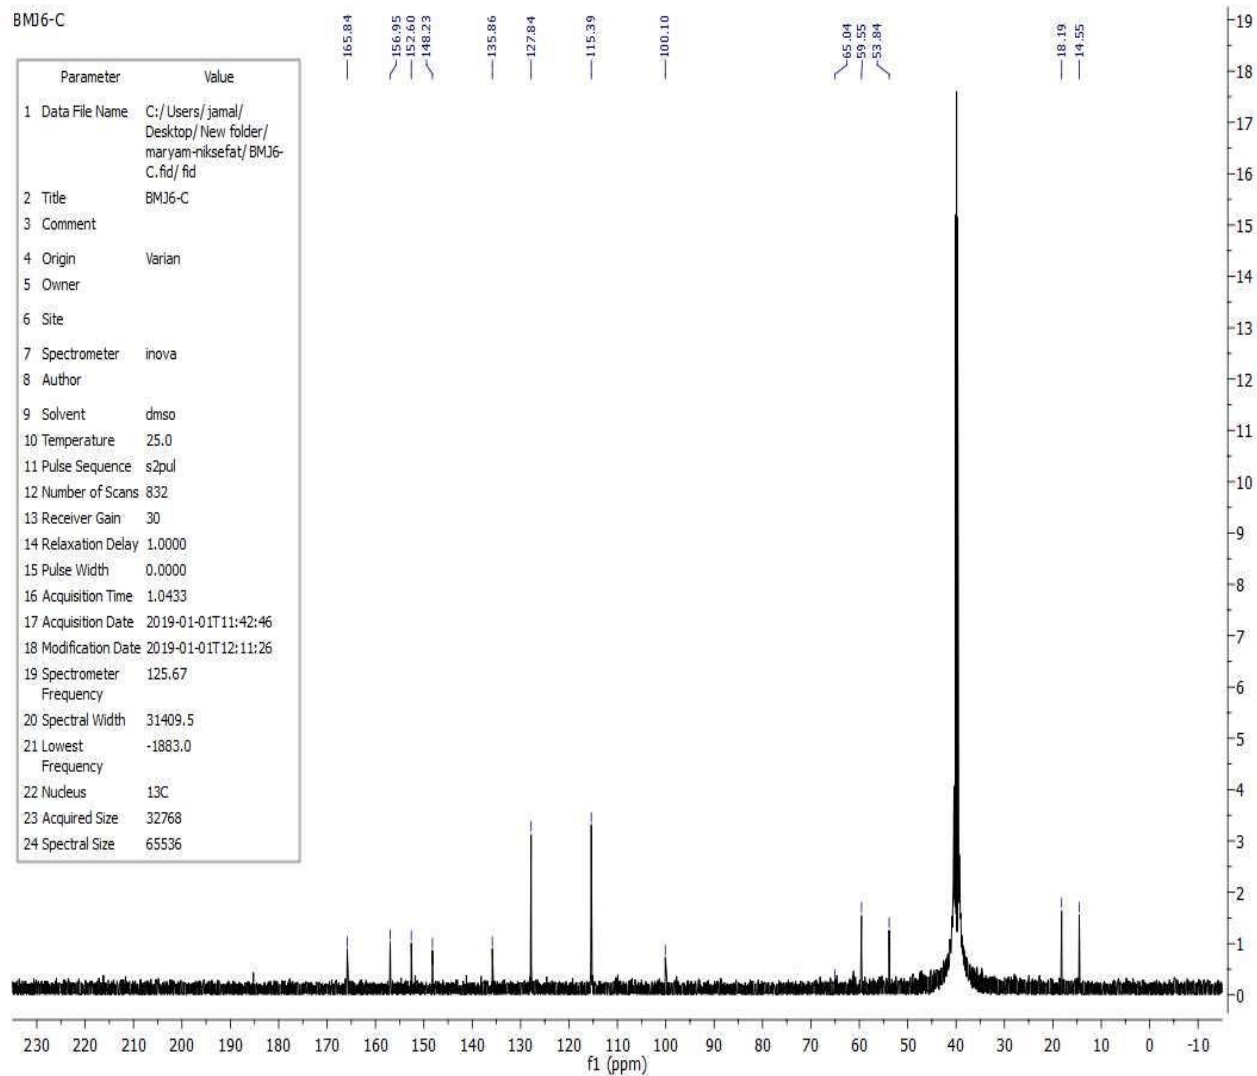

**Figure S4.** <sup>13</sup>C NMR spectrum of the product **4f**.

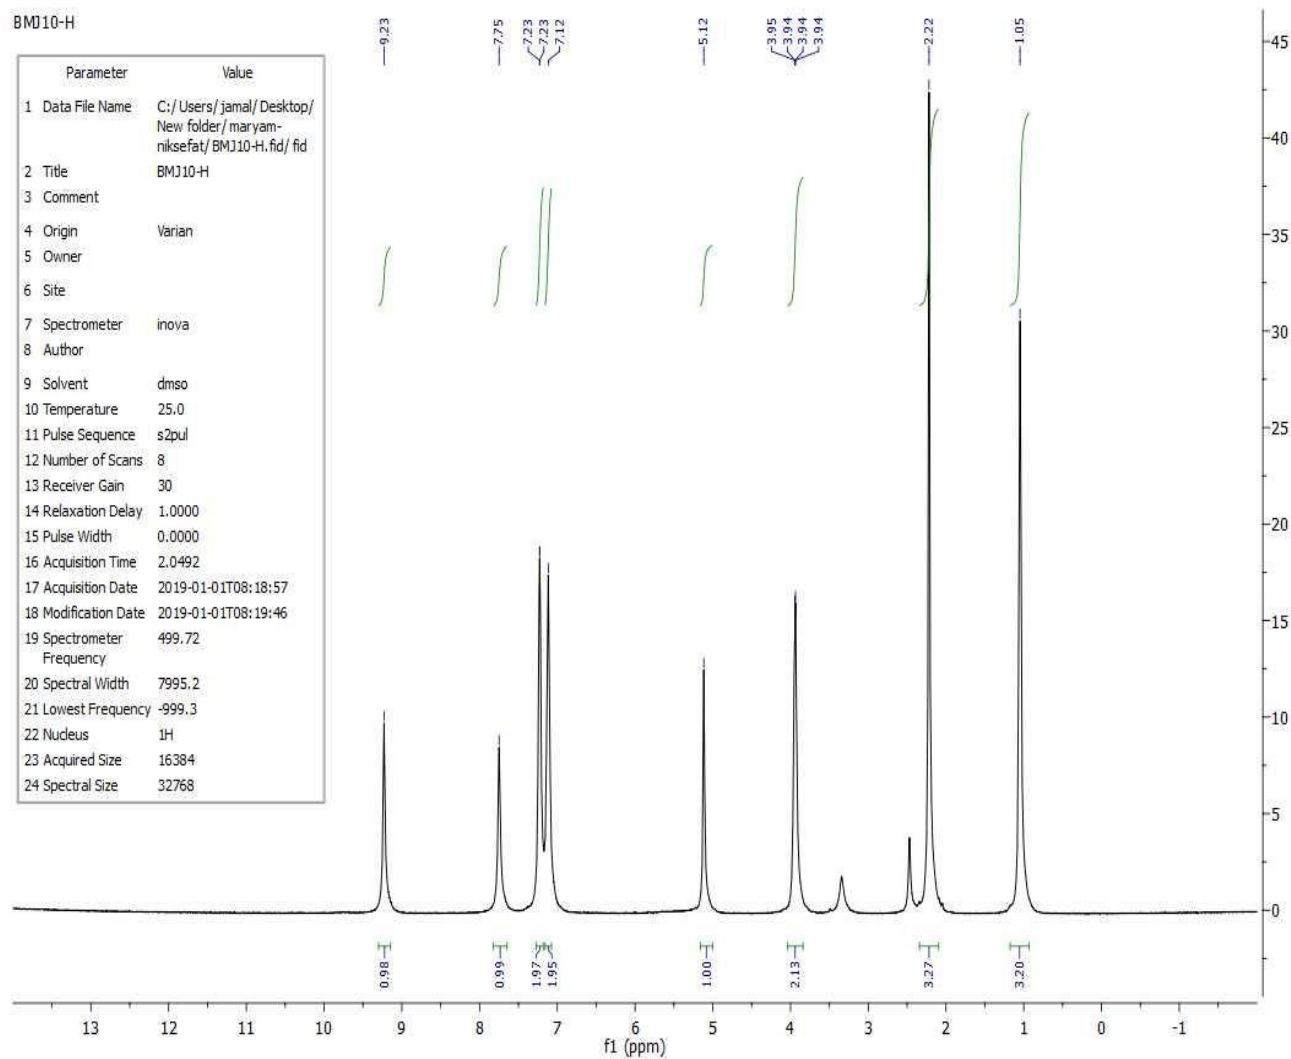

**Figure S5.** <sup>1</sup>H NMR spectrum of the product **4j**.

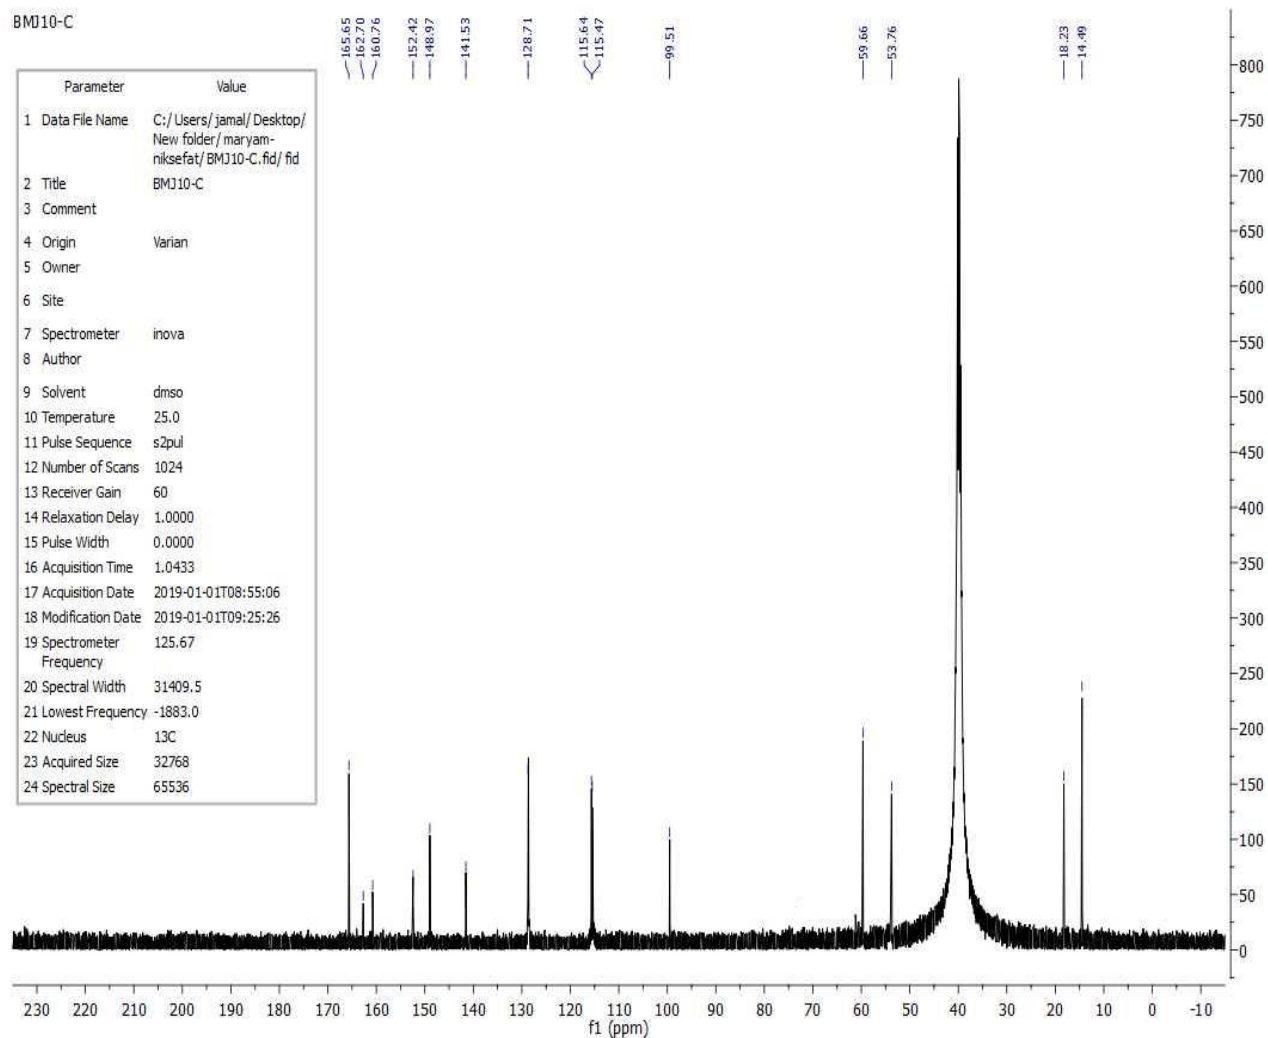

**Figure S6.** <sup>13</sup>C NMR spectrum of the product **4j**.

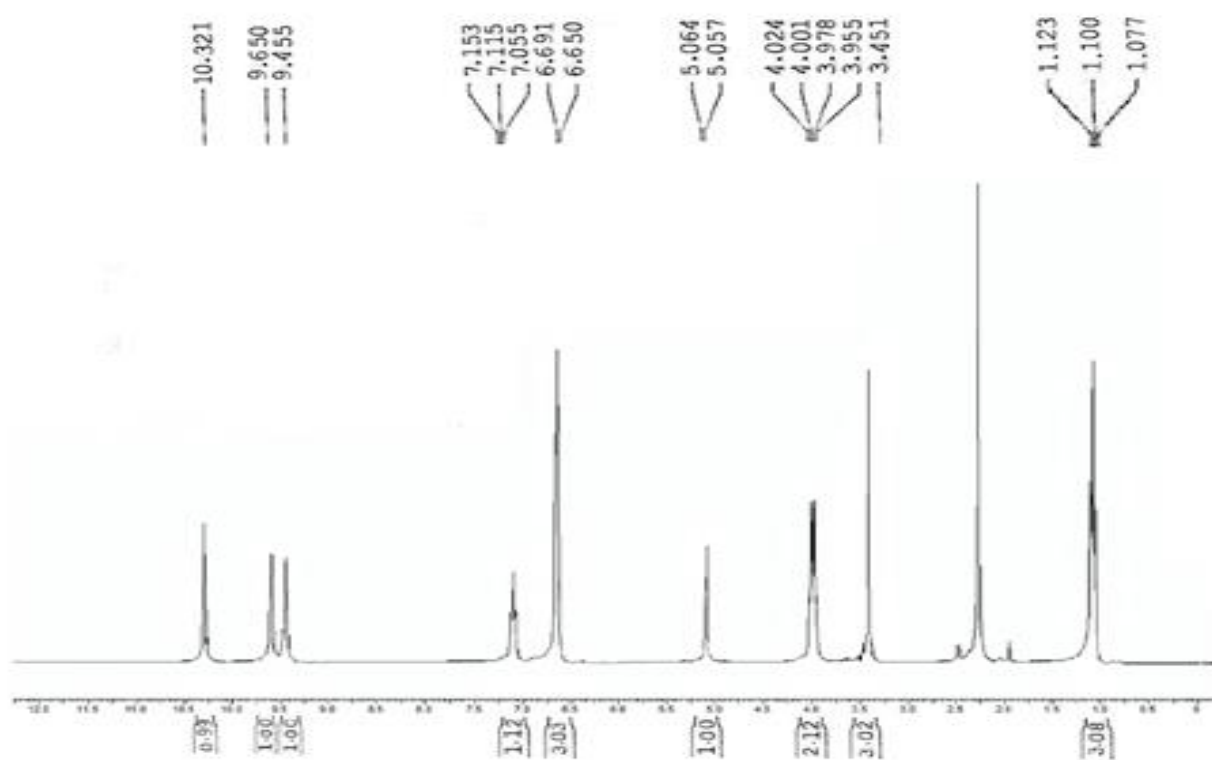

**Figure S7.** <sup>1</sup>H NMR spectrum of the product **4r**.



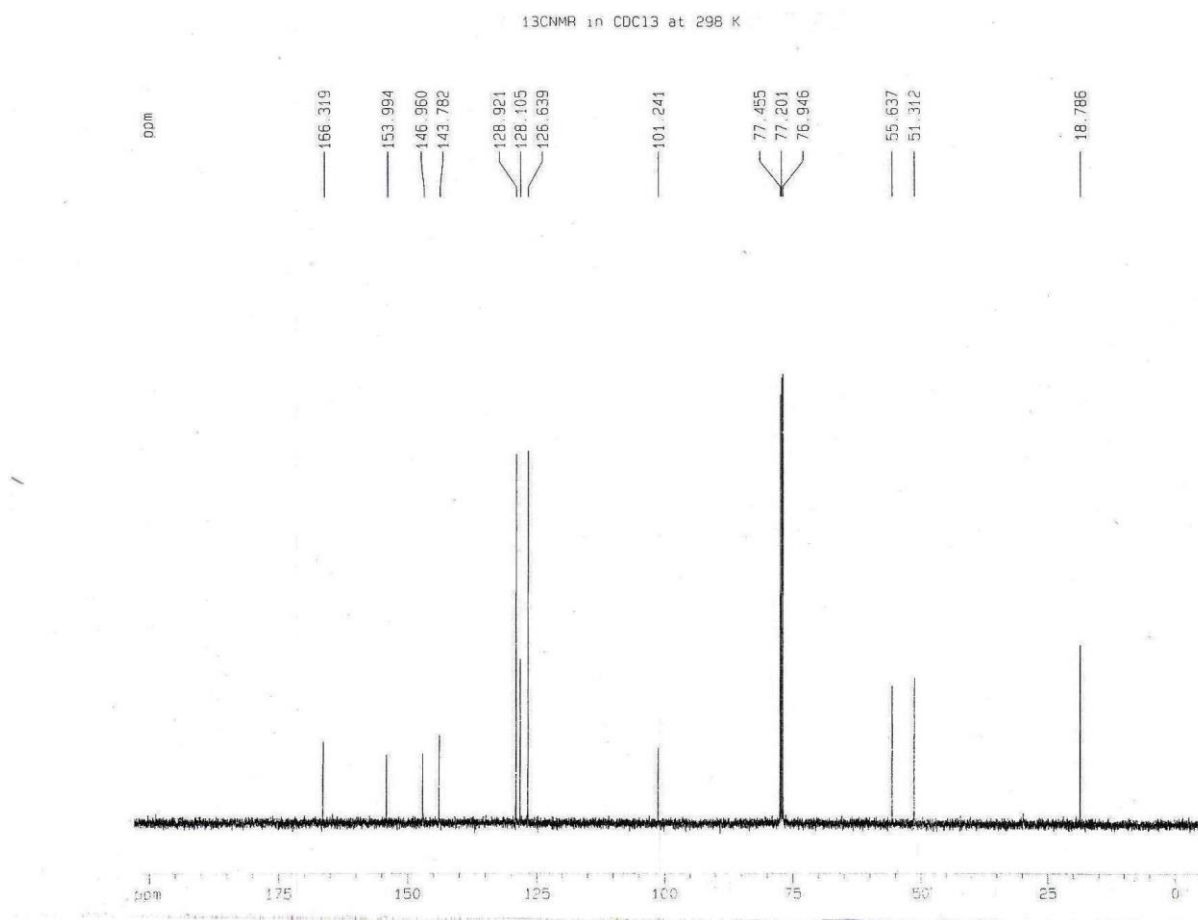

**Figure S9.** <sup>13</sup>C NMR spectrum of the product **4s**.

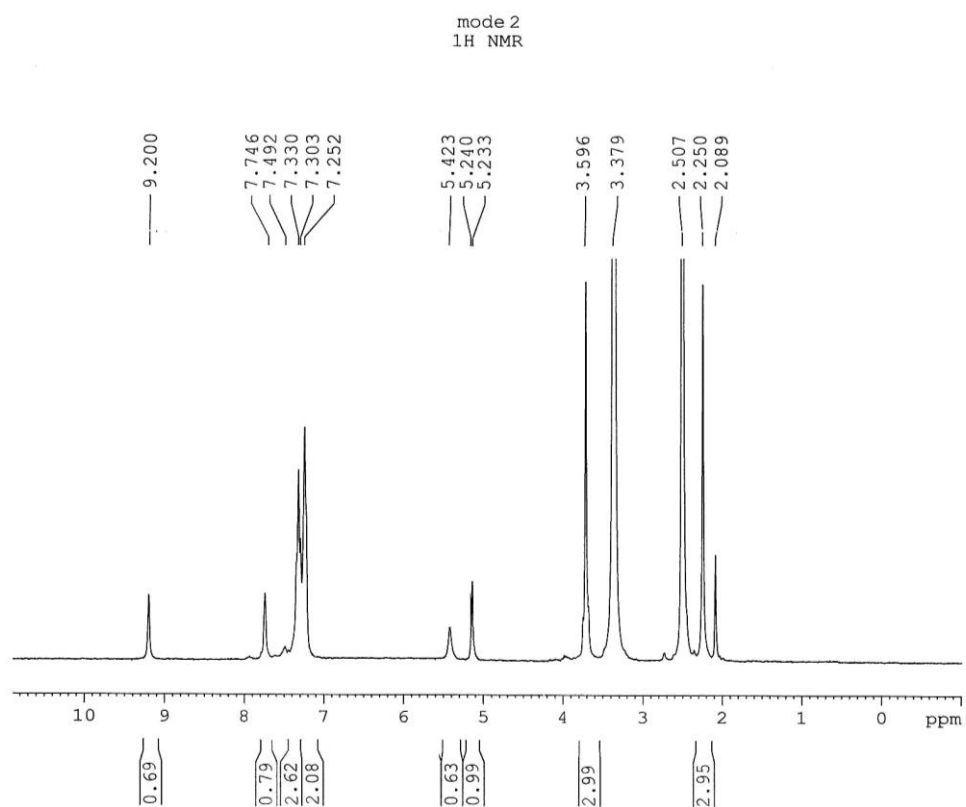

**Figure S10.**  $^1\text{H}$  NMR spectrum of the product **4t**.

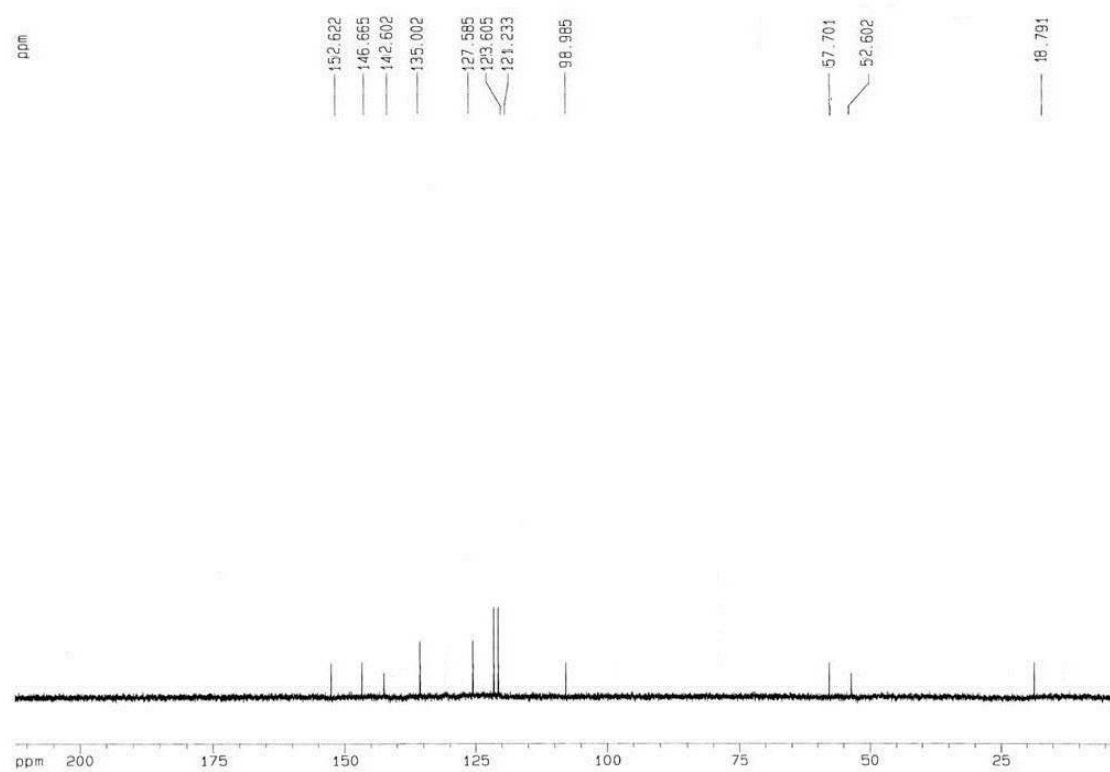

**Figure S11.**  $^{13}\text{C}$  NMR spectrum of the product **4t**.

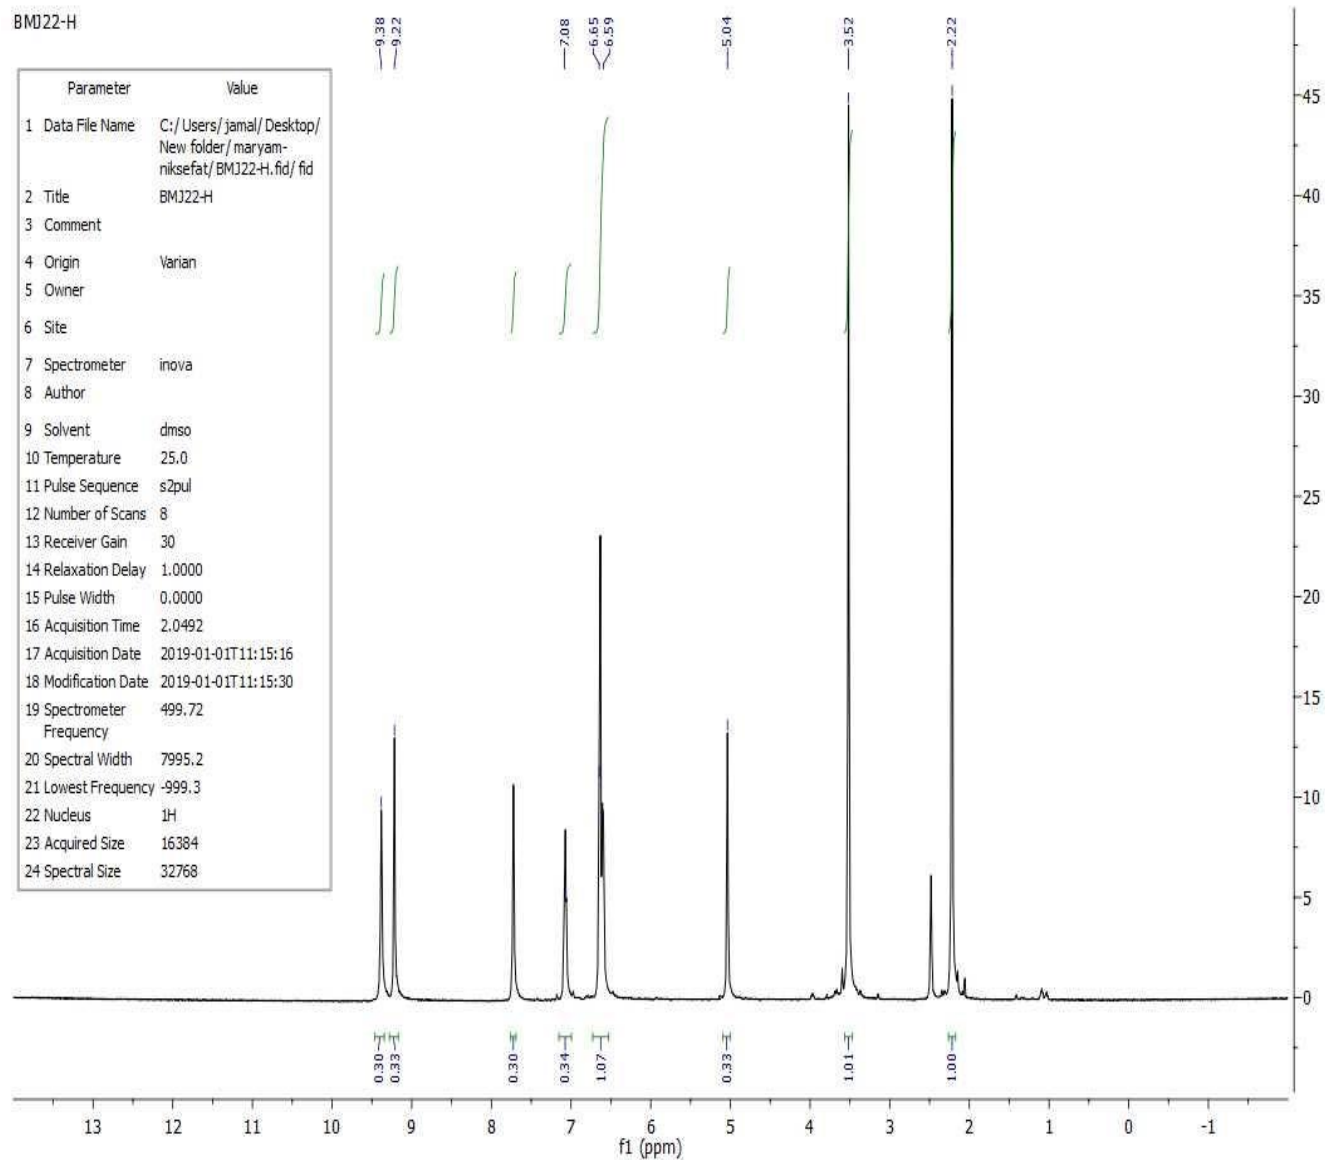

**Figure S12.** <sup>1</sup>H NMR spectrum of the product **4v**.

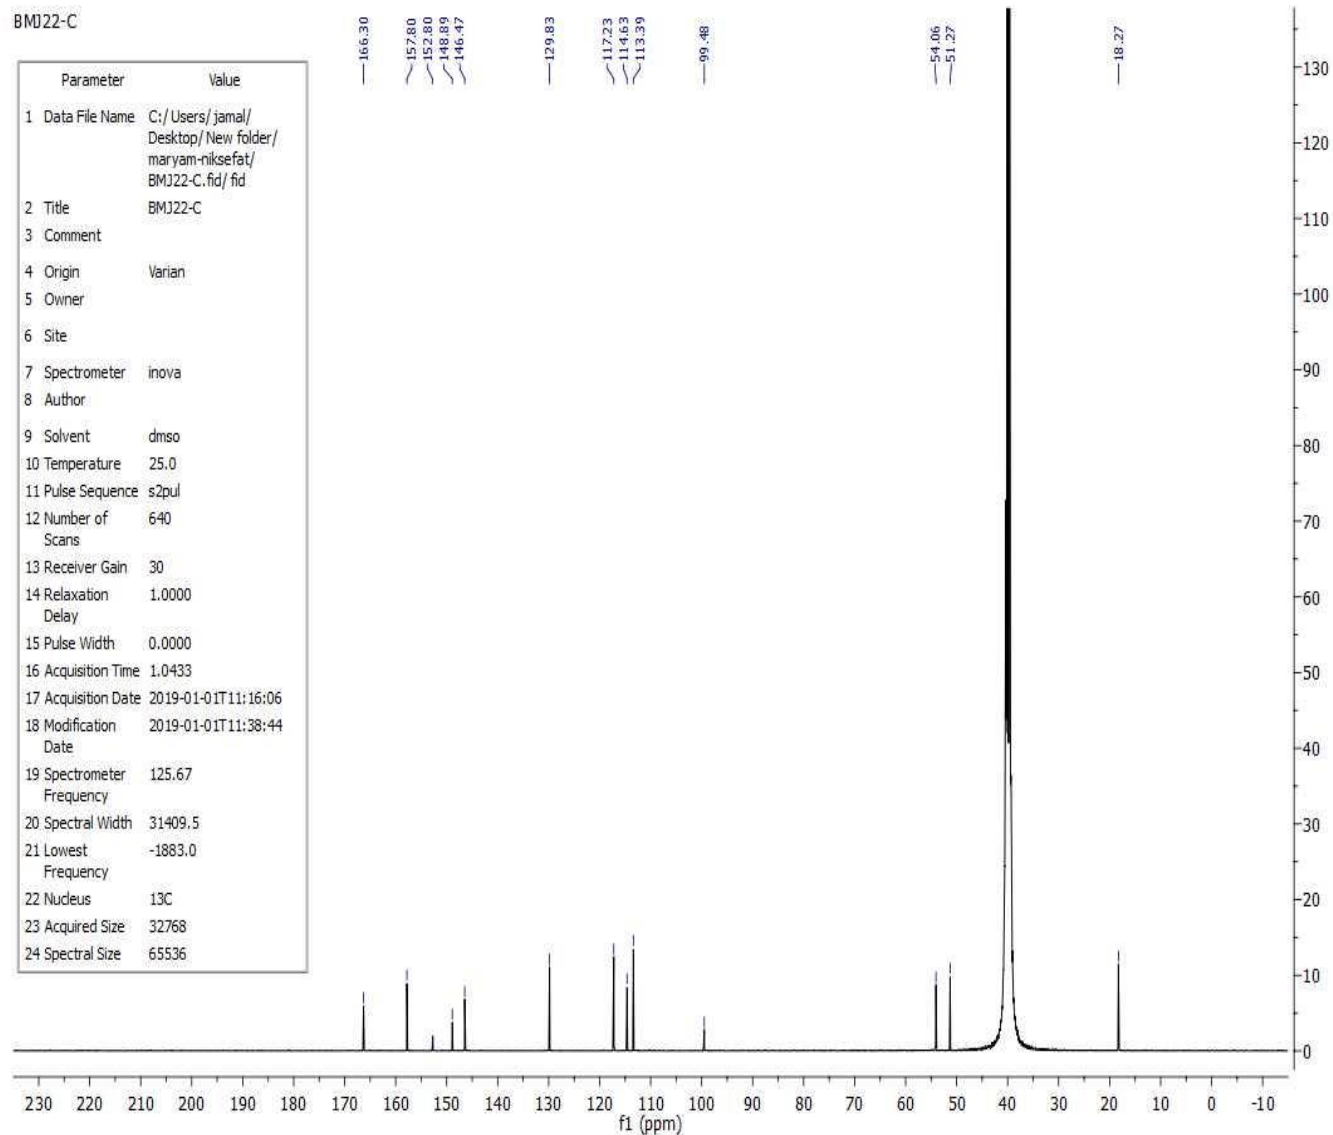

**Figure S13.** <sup>13</sup>C NMR spectrum of the product **4v**.
